# Supplementary material for: Assessment of Inactivating Stop Codon Mutations in Forty Saccharomyces cerevisiae Strains: Implications for [PSI +] Prion- Mediated Phenotypes
Source: PLoS One. 2011 Dec 15;6(12):e28684. doi: 10.1371/journal.pone.0028684 (PMC3240633; doi:10.1371/journal.pone.0028684)
Supplement: Figure S1 — Summary of total number and chromosome distribution of SNPs identified in 74-D694, G600 and thirty-eight SGRP S.cerevisiae strains. (XLS) [file pone.0028684.s001.xls]

## Sheet: Sheet2
Column A displays total number of SNPS per chromosome. Column B displays total number of SNPS found in orfs per chromosome. Column C displays total number of NON-synonymous changes per chromosome.
Strain	74d				YS9strain				G600				273614N				322134S				378604X
	A	B	C		A	B	C		A	B	C		A	B	C		A	B	C		A	B	C
Chr 1	923	559	200		1516	724	243		157	126	59		1448	606	223		1418	719	262		1268	573	214
Chr 2	1443	955	309		3633	2285	778		885	516	211		3918	2440	845		3886	2394	850		3116	1935	668
Chr 3	614	306	122		938	560	210		228	157	65		1004	565	203		1283	672	256		1640	822	292
Chr 4	2243	1380	482		5407	3460	1167		38	28	22		5308	3115	1101		5575	3573	1206		5504	3350	1116
Chr 5	1156	590	193		2193	1052	397		47	34	23		2625	1384	454		2462	1321	488		2696	1338	481
Chr 6	507	245	86		1668	825	269		32	14	7		1880	993	308		1367	744	239		1459	719	233
Chr 7	2611	1588	627		4304	2415	871		625	340	120		4337	2478	867		4489	2538	862		4353	2552	886
Chr 8	1678	1080	386		2131	1363	487		10	5	2		2351	1406	426		2380	1503	582		2231	1338	474
Chr 9	1907	1065	383		2328	1334	459		505	304	98		2357	1279	376		2236	1175	392		2051	1048	341
Chr 10	1284	808	310		3114	2076	737		380	270	94		3260	2194	795		2831	1802	648		2356	1466	551
Chr 11	1925	1117	365		3230	1969	638		515	312	117		2963	1744	551		3298	1956	631		2693	1482	470
Chr 12	1752	1118	342		4648	2949	985		652	461	150		4753	2941	944		4764	2973	1000		3879	2338	741
Chr 13	1533	978	368		3149	2031	731		655	380	138		2872	1749	627		3181	1944	680		3645	2369	823
Chr 14	1846	1147	411		2652	1702	639		673	396	177		2529	1595	597		2430	1570	616		2710	1683	633
Chr 15	2619	1659	566		4656	2780	949		983	618	228		4353	2484	849		4470	2742	902		5457	3202	1050
Chr 16	1584	1007	361		3016	1812	676		79	54	34		4267	2615	876		2557	1638	622		3589	2189	765
Mito	212	67	5		240	109	9		87	62	4		197	51	6		356	117	3		246	122	5
Totals	25837	15669	5516		48823	29446	10245		6551	4077	1549		50422	29639	10048		48983	29381	10239		48893	28526	9743
Strain	BC187				DBVPG1106				DBVPG1373				DBVPG1788				DBVPG1853				DBVPG6040
	A	B	C		A	B	C		A	B	C		A	B	C		A	B	C		A	B	C
Chr 1	1343	681	216		1243	608	216		1515	800	277		1541	750	270		1440	782	271		1322	648	215
Chr 2	3835	2406	800		3972	2512	841		4132	2580	872		4227	2634	893		4109	2633	904		3285	2009	657
Chr 3	762	386	161		593	339	130		622	359	141		623	379	151		1408	731	271		1419	791	307
Chr 4	4662	2907	1016		4213	2639	960		4352	2748	1021		4291	2675	987		6764	4297	1458		6212	3820	1271
Chr 5	2330	1138	438		2131	1019	400		2331	1153	452		2323	1167	458		2216	1161	434		2627	1359	464
Chr 6	1800	979	297		1788	983	298		1868	1009	317		1673	973	305		1791	966	295		1236	661	195
Chr 7	3876	2215	765		3881	2278	772		4014	2264	798		3973	2253	799		4245	2484	897		4067	2412	807
Chr 8	2333	1507	536		2142	1317	468		1998	1251	444		2166	1368	507		2376	1417	509		2492	1573	483
Chr 9	2132	1101	362		2158	1116	373		2231	1153	378		2149	1152	388		2575	1409	468		2044	1052	347
Chr 10	3104	1934	677		3037	1906	671		3064	1919	689		3135	1960	690		3452	2235	813		2874	1866	658
Chr 11	3344	1992	634		3341	1993	635		3467	2069	663		3326	1998	646		3580	2101	708		2773	1681	530
Chr 12	4925	3042	934		4378	2788	881		4509	2849	913		4627	2909	950		4867	2987	955		4113	2540	817
Chr 13	3135	1858	667		2939	1766	636		3152	1858	679		2940	1787	651		3671	2322	838		2902	1756	604
Chr 14	2251	1381	529		2245	1362	518		2303	1433	565		2237	1393	546		3405	2139	779		2215	1393	522
Chr 15	4537	2704	896		4650	2729	885		4606	2744	906		4682	2780	925		4412	2663	948		4462	2633	865
Chr 16	2118	1335	516		1959	1202	480		1955	1209	485		2006	1223	503		3469	2197	805		3674	2215	762
Mito	400	237	9		430	265	10		388	262	1		288	142	4		286	109	8		49	32	1
Totals	46887	27803	9453		45100	26822	9174		46507	27660	9601		46207	27543	9673		54066	32633	11361		47766	28441	9505
Strain	DBVPG6044				DBVPG6765				K11strain				L_1374				L_1528				NCYC110
	A	B	C		A	B	C		A	B	C		A	B	C		A	B	C		A	B	C
Chr 1	1828	899	310		1802	866	308		1500	791	258		1599	813	286		1515	787	251		1818	908	318
Chr 2	5013	3206	1075		4176	2508	868		3170	1989	671		4195	2637	891		4059	2526	851		5079	3261	1106
Chr 3	2324	1243	475		760	400	163		1964	1017	360		626	361	139		671	410	166		2386	1253	483
Chr 4	10981	6848	2242		4645	2853	1066		9166	5786	1821		4455	2732	1021		4301	2688	1000		10930	6862	2250
Chr 5	3898	2014	700		2328	1134	443		2859	1598	513		2179	1067	408		2223	1090	413		3851	1962	672
Chr 6	2558	1207	391		1972	1043	329		1179	583	182		1746	992	307		1837	1033	316		2251	1116	343
Chr 7	7557	4309	1454		4031	2291	800		6016	3519	1157		3810	2209	764		3897	2221	777		7524	4326	1458
Chr 8	4161	2464	881		2272	1471	542		3237	1995	610		2214	1355	486		2081	1248	452		4136	2475	882
Chr 9	3252	1821	615		2354	1173	401		2380	1235	412		2341	1264	427		2272	1186	385		3183	1748	594
Chr 10	5039	3143	1123		3390	2051	755		3192	2018	728		3137	1979	711		3191	2052	700		5023	3090	1078
Chr 11	4403	2597	861		3464	2062	678		2955	1752	579		3379	2002	652		3365	2007	649		4434	2589	858
Chr 12	6489	3944	1259		4541	2842	908		4382	2732	893		4578	2881	936		4531	2874	886		6419	3925	1253
Chr 13	5834	3748	1305		3175	1916	717		4164	2670	897		3004	1851	682		3013	1853	658		5776	3705	1288
Chr 14	5552	3530	1193		2615	1559	618		4272	2716	919		2296	1490	573		2358	1501	575		5525	3525	1201
Chr 15	7102	4120	1387		4832	2845	946		5200	3107	1051		4657	2767	891		4857	2787	891		6997	4102	1380
Chr 16	6643	3800	1295		2044	1267	523		5324	3168	1037		2014	1258	504		2019	1281	504		6607	3782	1296
Mito	495	195	8		903	254	22		157	48	5		348	141	7		323	202	11		552	195	8
Totals	83129	49088	16574		49304	28535	10087		61117	36724	12093		46578	27799	9685		46513	27746	9485		82491	48824	16468
Strain	NCYC361				RM11_1A				S288c				SK1strain				UWOPS03_461_4				UWOPS05_217_3
	A	B	C		A	B	C		A	B	C		A	B	C		A	B	C		A	B	C
Chr 1	1532	646	242		1825	951	331		93	74	40		1778	799	288		1895	993	333		2101	1072	353
Chr 2	3295	2113	660		4119	2566	888		162	105	72		4974	3131	1032		4696	2974	1007		4668	2978	1009
Chr 3	1162	624	224		774	427	182		11	5	3		1558	854	335		2383	1310	508		2438	1316	508
Chr 4	6022	3743	1270		4808	2942	1134		40	26	19		10926	6845	2236		10317	6617	2203		10183	6564	2192
Chr 5	2171	1130	383		2059	1080	441		16	9	8		3942	2039	718		3350	1860	603		3255	1825	590
Chr 6	1279	721	198		1998	1077	360		20	8	4		2560	1233	411		1965	1015	318		1977	1014	316
Chr 7	4153	2371	786		4215	2354	838		61	30	14		7314	4115	1382		7482	4294	1446		7489	4348	1455
Chr 8	2411	1484	470		2325	1482	582		6	5	3		4505	2627	965		3785	2316	766		3753	2251	740
Chr 9	2087	1099	339		2463	1289	430		17	5	3		3298	1806	614		3270	1693	542		3346	1709	553
Chr 10	2858	1900	639		3341	2127	802		62	35	24		4894	3024	1075		5198	3307	1081		4933	3152	1021
Chr 11	2910	1766	539		3472	2057	680		31	22	14		3821	2267	759		4209	2528	801		4174	2501	792
Chr 12	4240	2655	816		4867	3017	1012		41	18	11		6210	3795	1226		6527	4130	1327		6553	4129	1330
Chr 13	3323	2135	752		3169	1940	752		16	9	8		5624	3604	1276		5755	3676	1283		5729	3664	1276
Chr 14	2843	1772	610		2527	1520	615		28	16	13		4701	2919	1017		5162	3301	1140		4957	3167	1080
Chr 15	4402	2564	837		4977	2918	994		73	50	30		7292	4286	1420		7311	4369	1447		7302	4351	1451
Chr 16	3250	1915	681		2164	1349	564		52	48	29		6612	3778	1288		6175	3758	1270		6152	3743	1267
Mito	680	260	21		209	117	5		11	7	1		861	269	12		180	89	2		443	146	10
Totals	48618	28898	9467		49312	29213	10610		740	472	296		80870	47391	16054		79660	48230	16077		79453	47930	15943
Strain	UWOPS05_227_2				UWOPS83_787_3				UWOPS87_2421				W303				Y12				Y55strain
	A	B	C		A	B	C		A	B	C		A	B	C		A	B	C		A	B	C
Chr 1	1983	1015	334		1580	813	281		1274	628	212		860	276	89		1389	766	233		1881	1062	370
Chr 2	4714	2977	1010		4001	2498	781		4424	2795	894		947	601	209		3034	1866	632		4526	2810	958
Chr 3	2388	1308	506		1924	984	343		1997	1018	384		185	57	25		2011	1025	372		1113	676	250
Chr 4	10349	6707	2228		8652	5607	1683		8995	5667	1728		740	431	171		9189	5921	1869		10662	6766	2224
Chr 5	3384	1861	600		2291	1274	417		3362	1753	592		270	176	64		2998	1674	551		3924	1992	733
Chr 6	1939	998	309		1393	764	232		1594	797	232		164	96	34		1261	624	203		2249	1118	362
Chr 7	7498	4308	1454		5103	2930	934		5734	3196	969		1234	555	212		6030	3600	1163		6423	3551	1214
Chr 8	3815	2308	766		3255	1860	617		3090	1935	603		767	518	162		3460	2202	688		3590	2118	776
Chr 9	3325	1730	562		2596	1274	395		2606	1296	413		198	70	31		2357	1252	408		2593	1411	507
Chr 10	5194	3238	1054		3548	2226	701		3984	2565	835		239	116	50		3256	2067	742		4970	3044	1077
Chr 11	4257	2533	803		3371	1978	598		3015	1811	568		1460	935	335		2994	1774	579		4413	2599	858
Chr 12	6455	4138	1330		4705	2936	866		4585	2801	829		1126	781	245		4566	2908	997		6355	3759	1234
Chr 13	5698	3631	1265		4410	2798	904		4016	2613	846		895	538	204		4129	2681	903		3928	2457	886
Chr 14	5121	3267	1123		4350	2758	869		4097	2590	841		1060	527	221		4343	2771	924		4464	2674	969
Chr 15	7343	4374	1449		4838	2858	872		5532	3190	994		313	194	70		5116	3047	1038		5694	3332	1126
Chr 16	6186	3758	1270		4977	2926	918		3906	2310	797		29	16	15		5489	3274	1082		4234	2437	857
Mito	172	42	0		868	385	13		317	60	2		189	32	1		401	270	6		1141	315	21
Totals	79821	48193	16063		61862	36869	11424		62528	37025	11739		10676	5919	2138		62023	37722	12390		72160	42121	14422
Strain	Y9strain				YIIc17_E5				YJM789				YJM975				YJM978				YJM981
	A	B	C		A	B	C		A	B	C		A	B	C		A	B	C		A	B	C
Chr 1	1404	781	239		1503	780	265		2169	1193	378		1577	794	278		1276	564	207		1197	556	198
Chr 2	3073	1906	661		2936	1843	615		4089	2485	832		4022	2459	830		4021	2501	858		3951	2422	812
Chr 3	2003	1028	379		1259	655	229		1326	629	257		695	406	169		792	397	164		697	375	152
Chr 4	9084	5866	1860		6505	4299	1394		7268	4566	1509		4270	2615	1001		4325	2688	1004		4446	2833	1036
Chr 5	2995	1674	550		2658	1295	453		3229	1690	596		2255	1084	427		2441	1263	510		2233	1125	444
Chr 6	1244	587	184		1607	923	294		1524	743	248		1827	1022	316		1854	1023	318		1738	982	308
Chr 7	6038	3578	1169		4564	2630	861		4857	2870	990		3944	2248	795		3916	2216	772		3987	2243	781
Chr 8	3412	2172	685		2604	1604	520		2434	1509	496		2021	1263	457		2151	1301	465		2138	1313	462
Chr 9	2346	1344	449		2034	1161	367		2719	1519	513		2263	1133	372		2239	1152	379		2254	1251	425
Chr 10	3092	1987	712		3006	1861	652		3773	2526	909		3118	1956	700		3330	2127	778		3185	1996	706
Chr 11	3076	1793	584		3342	1978	653		3408	1977	630		3305	2029	649		3363	2026	655		3086	1928	608
Chr 12	4522	2867	971		5318	3365	1077		5038	3149	990		4586	2880	921		4636	2883	937		4516	2926	964
Chr 13	4090	2660	885		3791	2503	874		4697	2947	1018		3048	1815	671		3075	1851	680		3054	1826	664
Chr 14	4405	2785	943		3421	2205	763		3536	2101	721		2320	1417	546		2465	1486	579		2208	1391	530
Chr 15	5220	3049	1038		4280	2556	833		5496	3273	1056		4679	2756	902		4699	2771	916		4524	2687	870
Chr 16	5317	3220	1066		2941	1833	647		4363	2465	820		2028	1222	485		2017	1210	474		2157	1321	536
Mito	220	89	3		422	281	2		551	160	7		316	250	1		332	254	2		239	118	1
Totals	61541	37386	12378		52191	31772	10499		60477	35802	11970		46274	27349	9520		46932	27713	9698		45610	27293	9497
Strain	YPS128				YPS606				YS2strain				YS4strain
	A	B	C		A	B	C		A	B	C		A	B	C
Chr 1	2023	1011	321		1990	1015	309		1308	660	244		1383	695	265
Chr 2	3938	2488	737		3947	2467	721		3341	2126	728		3776	2362	830
Chr 3	2099	1050	369		2049	1033	358		1233	688	252		1256	686	260
Chr 4	9353	6009	1811		9484	6034	1825		6001	3715	1266		6251	3921	1410
Chr 5	2988	1612	516		2936	1582	512		2406	1217	428		2797	1500	520
Chr 6	1689	815	243		1744	816	243		1114	641	209		1346	695	228
Chr 7	6031	3464	1061		6105	3505	1073		3977	2249	793		4664	2625	935
Chr 8	3514	2110	630		3523	2157	648		2304	1463	485		2348	1503	530
Chr 9	2428	1379	415		2448	1341	409		2185	1224	399		2496	1398	451
Chr 10	3729	2271	692		3734	2284	699		3167	2029	747		2842	1792	632
Chr 11	3471	2065	592		3437	2055	585		3035	1799	577		3247	1894	635
Chr 12	5219	3376	913		5205	3362	911		4347	2701	836		4537	2857	956
Chr 13	4697	3087	978		4690	3065	972		3214	2072	738		3547	2242	817
Chr 14	4846	3105	977		4833	3060	956		3078	1892	674		3273	2023	736
Chr 15	5386	3134	955		5469	3186	974		4426	2668	835		4839	2992	959
Chr 16	5506	3291	965		5524	3296	967		3371	2048	720		4458	2619	944
Mito	225	135	5		268	123	2		325	94	2		259	139	6
Totals	67142	40402	12180		67386	40381	12164		48832	29286	9933		53319	31943	11114
